# Supplementary material for: Cost-effectiveness of precision medicine: a scoping review
Source: PubMed Central journal article supplement (PMC6867980; doi:10.1007/s00038-019-01298-x), 2019-11-15
Supplement: 38_2019_1298_MOESM1_ESM.pdf [file 38_2019_1298_MOESM1_ESM.pdf]

## **ESM\_1 - Supplementary Material**

### **1. Summary table of included studies**

## 1. Summary table of included studies

| Authors               | Year | Country   | Medical condition / Disease type | Type of economic evaluation | Perspective        | Authors' conclusion on cost-effectiveness | ICER*                                                                                                                                                                                                   | Willingness-to-pay threshold     | Sponsorship / Funding / Potential conflict of interest | Factors influencing cost-effectiveness           |
|-----------------------|------|-----------|----------------------------------|-----------------------------|--------------------|-------------------------------------------|---------------------------------------------------------------------------------------------------------------------------------------------------------------------------------------------------------|----------------------------------|--------------------------------------------------------|--------------------------------------------------|
| Ademi Z, et al.       | 2017 | SystRev   | Cardiovascular disease           | other                       | missing            | inconclusive                              | n/a                                                                                                                                                                                                     |                                  | Public and Industry                                    | Positive Predictive Value (PPV), Cost of testing |
| Ademi Z, et al.       | 2014 | Australia | Cardiovascular disease           | CEA                         | healthcare system  | yes                                       | AU\$3'565/QALY                                                                                                                                                                                          | not given                        | Public Funding                                         | none mentioned                                   |
| Alagoz O, et al.      | 2016 | USA       | Adverse Drug Reaction            | CEA                         | missing            | yes                                       | \$43'165 per additional LY and \$53'680 per additional QALY                                                                                                                                             | \$100'000 per QALY               | Industry                                               | Complication/Mortality, PPV, Cost of testing     |
| Alberts SR, et al.    | 2014 | USA       | Cancer                           | other                       | payer              | yes                                       | \$US991 per 0.114 QALYs                                                                                                                                                                                 | not given - cost comparison only | Industry                                               | none mentioned                                   |
| Balentine, CJ, et al. | 2017 | other     | Cancer                           | CEA                         | missing            | no                                        | \$9'400 per 4.47 quality-adjusted life-years vs \$6'100 per 4.50 QALYs for the standard procedure. There was only a 0.3% probability of PM being cost saving and a 14.9% probability of improving QALYs | \$100'000/QALY                   | Public and Industry                                    | Other                                            |
| Barzi A, et al.       | 2015 | USA       | Cancer                           | CEA                         | missing            | no                                        | \$35'143/LYG                                                                                                                                                                                            | \$50'000/LYG                     | Public                                                 | Costs of testing, PPV                            |
| Bentley TG, et al.    | 2014 | USA       | Cancer                           | CEA                         | payer              | yes                                       | \$50'273/QALY                                                                                                                                                                                           | \$100'000/QALY                   | Industry                                               | none mentioned                                   |
| Berm EJ, et al.       | 2016 | SystRev   | SystRev                          | other                       | n/a                | yes                                       | N/A                                                                                                                                                                                                     | N/A                              | Industry                                               | none mentioned                                   |
| Borse MS, et al.      | 2017 | USA       | Cardiovascular disease           | CEA                         | payer              | yes                                       | \$42'198 per major event avoided at one-year post intervention                                                                                                                                          | n/a                              | none declared.                                         | none mentioned                                   |
| Brown GC et al.       | 2015 | USA       | Other                            | CUA                         | societal and payer | yes                                       | net societal cost saving of \$160'582 per early treatment patient                                                                                                                                       | 3xGDP                            | Industry                                               | none mentioned                                   |
| Brown LC, et al.      | 2017 | USA       | Other                            | other                       | n/a                | yes                                       | medication cost saving of \$3'988/patient/year                                                                                                                                                          | n/a                              | Industry                                               | none mentioned                                   |

|                     |      |          |                        |       |                                |              |                                                                                                                                                                                        |                                                                               |                |                                                    |
|---------------------|------|----------|------------------------|-------|--------------------------------|--------------|----------------------------------------------------------------------------------------------------------------------------------------------------------------------------------------|-------------------------------------------------------------------------------|----------------|----------------------------------------------------|
| Buchanan J, et al.  | 2017 | UK       | Cancer                 | other | healthcare system and societal | no           | n/a (no ICER)                                                                                                                                                                          | £30'000/Q ALY or LYG                                                          | none declared  | Cost of treatment; Age at testing/Stage of disease |
| Chen YE, et al.     | 2016 | Taiwan   | Cancer                 | CEA   | healthcare system              | yes          | \$6'025 for Strategy 1 to \$145'110 for Strategy 4, whereas ICERs with respect to the next most cost-effective strategy ranged from \$6'025 for Strategy 1 to \$988'217 for Strategy 4 | \$50'000/Q ALY                                                                | Public         | PPV, uptake of screening                           |
| Chong HY, et al.    | 2017 | Malaysa  | Adverse Drug Reaction  | CEA   | societal                       | no           | LOSS of 0.0255 QALYs at an additional cost of \$707; LOSS of 0.2622 QALYs at an additional cost of \$4'127                                                                             | For universal screening: MYR 37 000 (\$8982)/Q ALY                            | Public funding | Cost of testing,                                   |
| Chong HY, et al     | 2014 | Thailand | Cardiovascular disease | CEA   | healthcare system and societal | no           | 1'477'042 THB (49'234 USD) per QALY or 1'473'852 THB [49'128 USD] per QALY                                                                                                             | less than 1.2 times the per-capita GNI (160,000 THB = \$5'333)                | none declared  | Cost of testing                                    |
| Cortejoso L, et al. | 2016 | Spain    | Cancer                 | CEA   | n/a                            | yes          | n/a                                                                                                                                                                                    | if min 2.1 cases of severe event per 1000 get prevented                       | none declared. | none mentioned                                     |
| Cromwell I, et al.  | 2016 | Canada   | Cancer                 | CEA   | missing                        | yes          | CAN\$8'123/0.64 QALY and 0.18 LYG                                                                                                                                                      | not given                                                                     | Public         | None mentioned                                     |
| D'Andrea E, et al,  | 2016 | SystRev  | Cancer                 | other | n/a                            | inconclusive | n/a                                                                                                                                                                                    | \$50,000–100,000/Q ALY or LYG for USA, and £20,000–30,000/QA LY or LYG for UK | Public         | PPV, Cost of testing                               |

|                        |      |             |                        |       |                   |              |                                                                                   |                                  |                     |                                                         |
|------------------------|------|-------------|------------------------|-------|-------------------|--------------|-----------------------------------------------------------------------------------|----------------------------------|---------------------|---------------------------------------------------------|
| D'Andrea E, et al.     | 2015 | SystRev     | Cancer                 | other | n/a               | yes          | n/a                                                                               | €37,000/QALY                     | Public              | none mentioned                                          |
| Dong D, et al.         | 2015 | Singapore   | Adverse Drug Reaction  | CEA   | healthcare system | no           | \$85'630/QALY and LOSS of 13'510USD/QALY (reduced QALYs)                          | \$50'000/QALY                    | none declared       | PPV, Cost of testing                                    |
| Eccleston A, et al.    | 2017 | UK          | Cancer                 | CEA   | healthcare system | yes          | £4'339/QALY                                                                       | £20'000/QALY                     | Industry and Public | none mentioned                                          |
| Elias J, et al.        | 2015 | Netherlands | Other                  | other | n/a               | no           | n/a                                                                               | not given - cost comparison only | none declared.      | none mentioned                                          |
| Fischer L, et al.      | 2015 | SystRev     | Cancer                 | CEA   | n/a               | yes          | ranged from cost-savings of €3'548 per patient to additional costs of €9'113/QALY | not given                        | non declared        | none mentioned                                          |
| Gallego CJ, et al.     | 2015 | USA         | Cancer                 | CEA   | societal          | yes          | \$36,500/QALY                                                                     | \$100'000/QALY                   | Public              | PPV, Cost of treatment                                  |
| Garrison LP Jr, et al. | 2015 | USA         | Cancer                 | other | missing           | n/a          | n/a                                                                               | n/a                              | Industry            | none mentioned                                          |
| Gonzalez FM, et al.    | 2015 | SystRev     | Cardiovascular disease | CEA   | n/a               | yes          | n/a                                                                               | \$50'000/QALY                    | None declared.      | PPV, Complications/Mortality                            |
| Goverde A, et al.      | 2016 | Netherlands | Cancer                 | CEA   | missing           | yes          | Max. €13'000/LYG                                                                  | €30'000/QALY, €40'000/LYG        | Public              | Complications/Mortality                                 |
| Green LE, et al.       | 2014 | USA         | Cancer                 | CEA   | payer             | yes          | Max. US\$65'000/QALY                                                              | \$100'000/QALY                   | Industry            | Cost of testing, age at testing/stage of disease, other |
| Grosse SD.             | 2015 | SystRev     | Cancer                 | CEA   | n/a               | yes          | Max. \$100'000/LYG or QALY, in all but one study                                  | \$100'000/QALY                   | none declared       | PPV, Cost of testing                                    |
| Hatz MH, et al.        | 2014 | SystRev     | SystRev                | CEA   | n/a               | inconclusive |                                                                                   | n/a                              | Public              | none mentioned                                          |
| Hochheiser LI, et al.  | 2014 | USA         | Cardiovascular disease | other | payer             | yes          | cost savings of \$0.77/person/month                                               | not given                        | Industry            | none mentioned                                          |
| Hörster L, et al.      | 2017 | Germany     | Cancer                 | CEA   | missing           | yes          | \$59'136/LYG                                                                      | 3xGDP                            | Public              | Cost of treatment                                       |

|                    |      |           |                        |       |                                |     |                                                                                                                                                                      |                                  |                   |                                                                             |
|--------------------|------|-----------|------------------------|-------|--------------------------------|-----|----------------------------------------------------------------------------------------------------------------------------------------------------------------------|----------------------------------|-------------------|-----------------------------------------------------------------------------|
| Jahn B, et al.     | 2015 | Austria   | Cancer                 | CEA   | societal                       | yes | €15'700/QALY                                                                                                                                                         | \$65'914 or \$25'435 /QALY       | Public            | Complications/Mortality, Cost of treatment, Age at testing/Stage of disease |
| Jahn B, et al.     | 2017 | other     | Cancer                 | CEA   | healthcare system              | yes | multiple                                                                                                                                                             | €50'000 or €100'000/QALY         | Public            | Complications/Mortality                                                     |
| Jiang M, et al.    | 2016 | Hong Kong | Cardiovascular disease | CEA   | healthcare system              | yes | \$75'208 cost and 7.6249QALY gained                                                                                                                                  | \$50'000/QALY                    | none declared.    | none mentioned                                                              |
| Johnson SG, et al. | 2015 | USA       | Cardiovascular disease | other | payer                          | yes | annual savings \$444,852 per 1000 patients                                                                                                                           | not given - cost comparison only | Industry          | none mentioned                                                              |
| Ke CH, et al.      | 2017 | Taiwan    | Adverse Drug Reaction  | CEA   | payer                          | yes | New Taiwan NT 234'610 (= \$7'508)/QALY                                                                                                                               | 3xGDP \$22'635 to \$67'905       | Public            | PPV, Complications/Mortality                                                |
| Kim DJ, et al.     | 2017 | Korea     | Cardiovascular disease | CEA   | healthcare system              | yes | \$1356.2/QALY                                                                                                                                                        | \$50'000/QALY                    | Public            | none mentioned                                                              |
| Làzaro P, et al.   | 2017 | Spain     | Cardiovascular disease | CEA   | healthcare system and societal | yes | €29'608 per QALY                                                                                                                                                     | €30'000/QALY                     | Public            | none mentioned                                                              |
| Lee WS, et al.     | 2014 | USA       | Cancer                 | CUA   | healthcare system and societal | no  | \$33.96/QALY                                                                                                                                                         | cost comparison                  | nothing mentioned | PPV                                                                         |
| Li Y, et al.       | 2017 | USA       | Cancer                 | CEA   | payer                          | yes | \$42,067/LYG or \$69,920/QALY for the 50-year-old cohort and \$23,734/LYG or \$48,328/QALY for the 40-year-old cohort.                                               | \$100'000/QALY                   | Industry          | Complications/Mortality, Cost of treatment, Cost of testing                 |
| Lim EA, et al.     | 2016 | Korea     | Cancer                 | CEA   | payer                          | yes | the average medical costs were \$23,952 USD in the no-testing strategy and \$23,334 USD in the testing strategy, and QALYs gained were 0.556 and 0.635 respectively. | not given                        | Public            | Cost of treatment                                                           |
| Lobo JM, et al.    | 2017 | USA       | Cancer                 | CEA   | missing                        | yes | \$90'833/QALY                                                                                                                                                        | \$100'000/QALY                   | Industry          | none mentioned                                                              |

|                           |      |             |                        |     |                                |              |                                                                                                                                                                                                                                                                                                                                                                                 |                                          |                     |                                                                                                                                           |
|---------------------------|------|-------------|------------------------|-----|--------------------------------|--------------|---------------------------------------------------------------------------------------------------------------------------------------------------------------------------------------------------------------------------------------------------------------------------------------------------------------------------------------------------------------------------------|------------------------------------------|---------------------|-------------------------------------------------------------------------------------------------------------------------------------------|
| Lu S, et al.              | 2016 | China       | Cancer                 | CEA | healthcare system              | inconclusive | \$16'820, \$16'850 and \$24'424/QALY for the 3 testing strategies when 1) PAP available, 2) no PAP available, 3) more than \$220,000/QALY                                                                                                                                                                                                                                       | \$32'000/QALY                            | Industry            | Cost of treatment (model only cost-effective if government patient assistance program to finance treatment is included into model), other |
| Luime JJ, et al.          | 2015 | Netherlands | Other                  | CEA | societal                       | yes          | Max ICER €5'314                                                                                                                                                                                                                                                                                                                                                                 | €20'000/QALY                             | none declared.      | none mentioned                                                                                                                            |
| Manchanda R, et al.       | 2014 | UK          | Cancer                 | CEA | missing                        | yes          | -£2079/QALY                                                                                                                                                                                                                                                                                                                                                                     | £20'000/QALY                             | Industry            | Age at testing/stage of disease                                                                                                           |
| Manchanda R, et al.       | 2017 | UK          | Cancer                 | CEA | payer                          | yes          | "Population testing for BRCA mutations is cost-saving in Ashkenazi-Jewish women with 2, 3, or 4 grandparents (22-33 days life gained) in the United Kingdom and 1, 2, 3, or 4 grandparents (12-26 days life-gained) in the United States populations, respectively. It is also extremely cost-effective in women in the United Kingdom with just 1 Ashkenazi-Jewish grandparent | £20'000 - £30'000/QALY and £100'000/QALY | Public              | none mentioned                                                                                                                            |
| Martes-Martinez C, et al. | 2017 | USA         | Cardiovascular disease | CUA | healthcare system              | no           | ICUR (cost-utility) \$127'501/QALY                                                                                                                                                                                                                                                                                                                                              | \$50'000/QALY                            | none declared.      | Cost of testing, accuracy of test, other                                                                                                  |
| Mitropoulou C, et al.     | 2015 | Croatia     | Cardiovascular disease | CEA | payer                          | yes          | €31'225/QALY                                                                                                                                                                                                                                                                                                                                                                    | not given                                | Public and industry | none mentioned                                                                                                                            |
| Mitropoulou C, et al.     | 2016 | Serbia      | Cardiovascular disease | CEA | payer                          | cost-saving  | cost-saving                                                                                                                                                                                                                                                                                                                                                                     | not given                                | Public and industry | none mentioned                                                                                                                            |
| Moretti ME, et al.        | 2017 | Canada      | Adverse Drug Reaction  | CEA | healthcare system and societal | yes          | CAN\$10'433/QALY                                                                                                                                                                                                                                                                                                                                                                | not given                                | Public              | PPV, Complications/Mortality,                                                                                                             |
| Narita Y, et al.          | 2015 | Japan       | Cancer                 | CEA | payer                          | yes          | ¥3.38 million (\$32,500)/QALY                                                                                                                                                                                                                                                                                                                                                   | ¥5 million (\$50'000)                    | Industry            | Cost of treatment                                                                                                                         |

|                        |      |           |                        |       |                   |              |                                                     |                                                                           |               |                                                 |
|------------------------|------|-----------|------------------------|-------|-------------------|--------------|-----------------------------------------------------|---------------------------------------------------------------------------|---------------|-------------------------------------------------|
| Naylor, RN, et al.     | 2014 | other     | other                  | CEA   | healthcare system | no           | \$205'000/QALY                                      | From \$50'000/QALY to \$109'000–\$297'000/QALY                            | Public        | PPV, Cost of testing                            |
| Nguyen HV, et al.      | 2017 | Singapore | other                  | CEA   | payer             | no           | \$93'663/QALY                                       | \$50'000/QALY                                                             | Public        | PPV, Cost of testing                            |
| Patel V, et al.        | 2014 | USA       | Cardiovascular disease | CUA   | healthcare system | yes          | ICUR \$4'200                                        | \$100'000/QALY                                                            | Industry      | Complications/Mortality, PPV, Cost of treatment |
| Pink J, et al.         | 2014 | other     | Cardiovascular disease | CEA   | healthcare system | yes          | £13'226/QALY to £19,858/QALY depending on strategy. | comparison                                                                | Public        | Complications/Mortality                         |
| Plöthner M, et al.     | 2016 | Germany   | SystRev                | CEA   | n/a               | inconclusive | n/a                                                 | influencing factors                                                       | None declared | PPV, Cost of testing, Accuracy of test, Other   |
| Plumpton CO, et al.    | 2015 | UK        | Adverse Drug Reaction  | CEA   | healthcare system | yes          | £12'808/QALY                                        | £20'000/QALY                                                              | Public        | Complications/Mortality                         |
| Plumpton CO, et al.    | 2016 | SystRev   | Adverse Drug Reaction  | other | n/a               | yes          | n/a                                                 | n/a                                                                       | Public        | Other (needs clinical evidence)                 |
| Rosenblatt JD, et al.  | 2017 | SystRev   | other                  | CEA   | n/a               | inconclusive | n/a                                                 | \$50'000/QALY                                                             | Industry      | none mentioned                                  |
| Rosso A, et al.        | 2017 | SystRev   | Cardiovascular disease | CEA   | n/a               | yes          | n/a                                                 | £20'000–£30'000/QALY or LYG for UK; \$50'000–\$100,000/QALY or LYG in USA | Public        | none mentioned                                  |
| Rubio-Terrés C, et al. | 2015 | Spain     | Cardiovascular disease | other | healthcare system | yes          | n/a                                                 | €30'000                                                                   | Industry      | Cost of testing                                 |
| Ruiz-Iruela C, et al.  | 2016 | Europe    | Adverse Drug Reaction  | CEA   | missing           | yes          | €306 per event avoided                              | not given - cost comparison only                                          | none declared | PPV, Cost of treatment                          |

|                      |      |          |                        |       |                   |              |                                                                                     |                                                                             |                     |                                                             |
|----------------------|------|----------|------------------------|-------|-------------------|--------------|-------------------------------------------------------------------------------------|-----------------------------------------------------------------------------|---------------------|-------------------------------------------------------------|
| Saokaew S, et al.    | 2014 | Thailand | Adverse Drug Reaction  | CEA   | societal          | yes          | \$5'062/QALY                                                                        | 1.2 times Gross National Income (GNI) per capita or 160,000 THB (USD 5,161) | Public              | Cost of testing, cost of treatment, Complications/Mortality |
| Schackman BR, et al. | 2015 | USA      | other                  | CEA   | healthcare system | yes          | non genetic strategy >\$100'000/QALY                                                | \$100'000/QALY                                                              | Public and Industry | Cost of treatment                                           |
| Schremser K, et al.  | 2015 | Germany  | Cancer                 | CEA   | payer             | yes          | €15'577/QALY                                                                        | 3xGDP €70'500–€106'000 in Germany or £20'000–£30000/QALY in UK              | Public and Industry | Complications/Mortality, Age at testing/stage of disease    |
| Segui MA, et al.     | 2014 | Spain    | Cancer                 | CEA   | healthcare system | yes          | €6'169/QALY at 10 years, €287/QALY at lifetime                                      | €30'000/LYG and QALY                                                        | none declared       | none mentioned                                              |
| Severin F, et al.    | 2015 | Germany  | Cancer                 | CEA   | payer             | no           | ranges between €77'268 per LYG in strategy B-2 and €4'188'036 per LYG in strategy 7 | threshold of €50'000/LYG                                                    | Industry            | None mentioned                                              |
| Shiffman D, et al.   | 2015 | USA      | cardiovascular disease | CEA   | payer             | yes          | \$47'148) if 2.1 % or more of the test positive patients were to adhere to warfarin | not given                                                                   | Industry            | Other (adherence)                                           |
| Snowsill T, et al.   | 2014 | UK       | Cancer                 | CEA   | healthcare system | yes          | £5491/QALY for strategy 5 to £9571/QALY for strategy 8                              | £20'000/QALY                                                                | Public              | PPV, other                                                  |
| Snowsill T, et al.   | 2017 | UK       | Cancer                 | CEA   | healthcare system | yes          | £11'008/QALY                                                                        | £20,000/QALY                                                                | Public              | PPV, Complications/mortality, other                         |
| Snowsill T, et al.   | 2015 | UK       | Cancer                 | CUA   | healthcare system | yes          | £5'491/QALY                                                                         | £20'000/QALY                                                                | Public              | Cost of testing, other (utility)                            |
| Thompson AJ, et al.  | 2014 | UK       | other                  | CEA   | healthcare system | inconclusive | £256.89/QALY                                                                        | £20'000/QALY                                                                | Public              | none mentioned                                              |
| Verbelen M, et al.   | 2017 | SystRev  | SystRev                | other | n/a               | yes          | n/a                                                                                 | different                                                                   | Public and industry | none mentioned                                              |



|                        |      |             |                        |       |                   |              |                                                                                                 |                                              |                     |                                                    |
|------------------------|------|-------------|------------------------|-------|-------------------|--------------|-------------------------------------------------------------------------------------------------|----------------------------------------------|---------------------|----------------------------------------------------|
| Verhoef TI, et al.     | 2015 | Netherlands | Cardiovascular disease | CEA   | healthcare system | no           | €28'349 and €24'427 for different strategies                                                    | €20'000/QALY                                 | Public and industry | none mentioned                                     |
| Verhoef TI, et al.     | 2016 | Sweden      | Cardiovascular disease | CEA   | healthcare system | yes          | £6'702/QALY in the UK and 253'848 SEK in Sweden                                                 | £20'000/QALY and SEK500'000/QALY (= £40'000) | Public and Industry | Other                                              |
| Wallbillich JJ, et al. | 2016 | USA         | Cancer                 | CUA   | payer             | no           | \$479'303/QALY                                                                                  | \$100'000/QALY                               | none declared.      | Cost of treatment                                  |
| Wang Y, et al.         | 2017 | Hong Kong   | Cardiovascular disease | CEA   | healthcare system | yes          | \$2'560/QALY                                                                                    | < 1xGDP = \$42'423/QALY                      | none declared       | Cost of testing                                    |
| Wu AC, et al.          | 2015 | USA         | other                  | other | societal          | cost-saving  | cost-saving                                                                                     | not given - cost comparison only             | Public              | none mentioned                                     |
| Yamauchi H, et al.     | 2014 | Japan       | Cancer                 | CEA   | societal          | yes          | \$6368/QALY or ¥636'752/QALY                                                                    | ¥6 million/QALY                              | Industry            | Cost of treatment, Age at testing/Stage of disease |
| You JH.                | 2015 | Hong Kong   | Cardiovascular disease | CEA   | payer             | yes          | cost-saving but reduces QALY. Not using genotype-guided DOAC resulted in ICER of \$314'129/QALY | \$50'000/QALY                                | Public              | Cost of treatment                                  |
| You, JH.               | 2014 | other       | Cardiovascular disease | CEA   | payer             | yes          | \$2843/QALY                                                                                     | \$50'000/QALY                                | Public              | Complications/Mortality, Cost of treatment         |
| Ziegler A, et al.      | 2017 | SystRev     | other                  | other | n/a               | inconclusive | n/a                                                                                             | n/a                                          | none declared       | none mentioned                                     |

\* incremental cost-effectiveness ratio: amount of money per QALY or LYG (Year of life gained) compared to std)
